# Supplementary material
Source: PubMed Central journal article supplement (PMC8485209)
Supplement: jamaoncol-e215437-s001.pdf [file jamaoncol-e215437-s001.pdf]

## Supplemental Online Content

Mair MJ, Berger JM, Berghoff AS, et al. Humoral immune response in hematological patients and health care workers who received SARS-CoV-2 vaccinations. *JAMA Oncol*. Published online September 30, 2021. doi:10.1001/jamaoncol.2021.5437

**eFigure.** Anti-S levels after the second dose according to applied treatment in patients with solid tumors

**eTable 1.** Confirmed SARS-CoV-2 infections and anti-NC detection rates in hematological patients

**eTable 2.** Health care workers' cohort

This supplemental material has been provided by the authors to give readers additional information about their work.

**eFigure.** Anti-S levels after the second dose according to applied treatment in patients with solid tumors (other including hormonal therapy, radiotherapy and bisphosphonates).

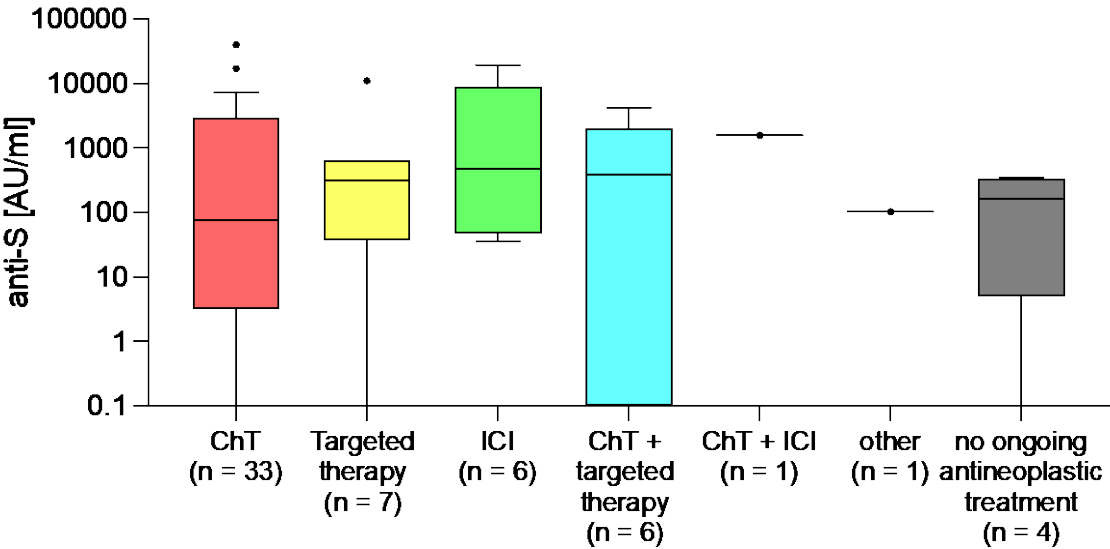

**eTable 1. Confirmed SARS-CoV-2 infections and anti-NC detection rates in hemato-oncological patients.** Cut-off for anti-NC antibody positivity was used as recommended by the manufacturer.

|                           |          | <b>Past SARS-CoV-2 infection</b><br>(confirmed by rt-PCR) |             |                                          |
|---------------------------|----------|-----------------------------------------------------------|-------------|------------------------------------------|
|                           |          | <b>+</b>                                                  | <b>-</b>    |                                          |
| <b>anti-NC antibodies</b> | <b>+</b> | 4 (3.6%)                                                  | 3 (2.7%)    | <b>Vienna cohort</b><br><b>(n = 111)</b> |
|                           | <b>-</b> | 1 (0.9%)                                                  | 103 (92.8%) |                                          |
|                           | <b>+</b> | 31 (6.7%)                                                 | 11 (2.4%)   | <b>Meran cohort</b><br><b>(n = 462)</b>  |
|                           | <b>-</b> | 7 (1.5%)                                                  | 413 (89.4%) |                                          |

**eTable 2. Health care workers' cohort.**

|                                                                                                             | <b>Health care workers cohort (n = 58)</b> |
|-------------------------------------------------------------------------------------------------------------|--------------------------------------------|
| <b>Age (median, range)</b>                                                                                  | <b>42 (24 – 60)</b>                        |
| <b>Gender</b>                                                                                               |                                            |
| - Male                                                                                                      | 18 (31.0%)                                 |
| - Female                                                                                                    | 40 (69.0%)                                 |
| <b>Profession</b>                                                                                           |                                            |
| - Physician/medical oncologist                                                                              | 19 (32.8%)                                 |
| - Nurse                                                                                                     | 24 (41.4%)                                 |
| - Administrative staff                                                                                      | 6 (10.3%)                                  |
| - Other (biomedical analysts, scientific assistants, dieticians)                                            | 9 (15.5%)                                  |
| <b>Primary working environment</b>                                                                          |                                            |
| - Inpatient ward/day hospital unit                                                                          | 37/58 (63.8%)                              |
| - Outpatient department                                                                                     | 13/58 (22.4%)                              |
| - No direct contact with patients (administrative and scientific staff)                                     | 8/58 (13.8%)                               |
| <b>Pre-vaccination (baseline)</b>                                                                           | <b>n = 58</b>                              |
| Verified SARS-CoV-2 infection                                                                               | 2 (3.4%)                                   |
| Positive anti-NC antibodies                                                                                 | 3 (5.2%)                                   |
| <b>Longitudinal cohort</b>                                                                                  | <b>n = 49</b>                              |
| <b>Used vaccine</b>                                                                                         |                                            |
| - BioNTech/Pfizer (BNT162b2)                                                                                | 33 (67.3%)                                 |
| - AstraZeneca (AZD1222)                                                                                     | 10 (20.4%)                                 |
| - No vaccination                                                                                            | 6 (12.2%)                                  |
| <b>1<sup>st</sup> follow-up (3-5 weeks after launch of the institutional vaccination campaign, n = 48)</b>  |                                            |
| Verified SARS-CoV-2 infection                                                                               | 3 (6.3%)                                   |
| Positive anti-NC antibodies                                                                                 | 4 (8.3%)                                   |
| Vaccination status                                                                                          |                                            |
| - unvaccinated                                                                                              | 17 (35.4%)                                 |
| - 1 dose                                                                                                    | 31 (64.6%)                                 |
| - 2 doses                                                                                                   | 0 (0.0%)                                   |
| <b>2<sup>nd</sup> follow-up (8-12 weeks after launch of the institutional vaccination campaign, n = 48)</b> |                                            |
| Verified SARS-CoV-2 infection                                                                               | 4 (8.3%)                                   |
| Positive anti-NC antibodies                                                                                 | 5 (10.4%)                                  |
| Vaccination status                                                                                          |                                            |
| - unvaccinated                                                                                              | 8 (16.7%)                                  |
| - 1 dose                                                                                                    | 9 (18.8%)                                  |
| - 2 doses                                                                                                   | 31 (64.6%)                                 |
